# Supplementary material
Source: publisher figshare collection journal article supplement (https://wiley.figshare.com/articles/dataset/_/3563082)
Supplement: Supplementary file 1 [file 1]

Brost, B. M., M. B. Hooten, E. M. Hanks, and R. J. Small. 2016. Animal movement constraints improve resource selection inference in the presence of telemetry error. *Ecology*.

#### Appendix D. Summary of results for an analysis of harbor seal data near Kodiak Island, Alaska, USA.

Table D1. Parameter estimates from an analysis of an adult female harbor seal near Kodiak Island, AK. Reported values are the posterior mean and 95% equal-tail credible intervals based on 100,000 MCMC samples. Convergence was determined based on potential scale reduction factors  $< 1.1$  (Gelman and Rubin 1992). The parameter  $\beta_1$  describes selection relative to distance to haul-out site, whereas  $\beta_2$  describes selection for bathymetry. Both covariates were centered and scaled to unit variance prior to model fitting. Note that  $\phi$ ,  $\beta_1$ , and  $\beta_2$  are process model parameters that describe harbor seal behavior; therefore, they are global parameters that are not estimated for separate Argos location classes.

| Argos<br>location class | $\sigma$ (m)         | $a$               | $\rho$            | $\nu$               | $\phi$ (m/hour)  | $\beta_1$      | $\beta_2$      |
|-------------------------|----------------------|-------------------|-------------------|---------------------|------------------|----------------|----------------|
| 3                       | 2259 (1447, 3242)    | 0.69 (0.42, 0.97) | 0.85 (0.51, 0.99) | 16.52 (2.80, 29.34) |                  |                |                |
| 2                       | 1089 (614, 1696)     | 0.42 (0.21, 0.82) | 0.73 (0.14, 0.99) | 2.29 (1.15, 4.53)   |                  |                |                |
| 1                       | 1365 (1051, 1718)    | 0.64 (0.42, 0.90) | 0.40 (0.03, 0.70) | 1.72 (1.27, 2.30)   | 413.00           | -2.03          | -0.82          |
| 0                       | 2720 (2317, 3155)    | 0.50 (0.37, 0.66) | 0.16 (0.01, 0.41) | 1.59 (1.29, 1.95)   | (350.72, 480.70) | (-2.45, -1.62) | (-1.12, -0.53) |
| A                       | 2702 (2257, 3186)    | 0.90 (0.72, 1.00) | 0.21 (0.01, 0.48) | 1.23 (1.00, 1.50)   |                  |                |                |
| B                       | 13338 (11342, 15542) | 0.74 (0.59, 0.92) | 0.30 (0.02, 0.53) | 1.01 (0.85, 1.18)   |                  |                |                |

#### LITERATURE CITED

Gelman, A. and D. B. Rubin. 1992. Inference from iterative simulation using multiple sequences. *Statistical Science* **7**:457-511.
